# Supplementary material for: Expanding the scope of cyclopropene reporters for the detection of metabolically engineered glycoproteins by Diels–Alder reactions
Source: publisher site journal article supplement (doi:10.3762/bjoc.10.232), 2014-09-22

## Supporting Information

for

# Expanding the scope of cyclopropene reporters for the detection of metabolically engineered glycoproteins by Diels–Alder reactions

Anne-Katrin Späte<sup>1</sup>, Verena F. Schart<sup>1</sup>, Julia Häfner<sup>2</sup>, Andrea Niederwieser<sup>1</sup>, Thomas U. Mayer<sup>2</sup>, and Valentin Wittmann<sup>\*,§,1</sup>

Address: <sup>1</sup>University of Konstanz, Department of Chemistry and Konstanz Research School Chemical Biology (KoRS-CB), Universitätsstraße 10, 78457 Konstanz (Germany) and <sup>2</sup>University of Konstanz, Department of Biology and Konstanz Research School Chemical Biology (KoRS-CB), Universitätsstraße 10, 78457 Konstanz (Germany)

Valentin Wittmann\* - mail@valentin-wittmann.de

<sup>§</sup>Phone: +49-7531-884572, Fax: +49-7531-884573

\*Corresponding Author

## Additional MOE experiments and NMR spectra

### Content

|                                                                                                                                         |    |
|-----------------------------------------------------------------------------------------------------------------------------------------|----|
| Additional MOE experiments .....                                                                                                        | S2 |
| <sup>1</sup> H and <sup>13</sup> C NMR spectra of Ac <sub>4</sub> GlcNCyoc ( <b>1</b> ) and Ac <sub>4</sub> GalNCyoc ( <b>2</b> ) ..... | S5 |

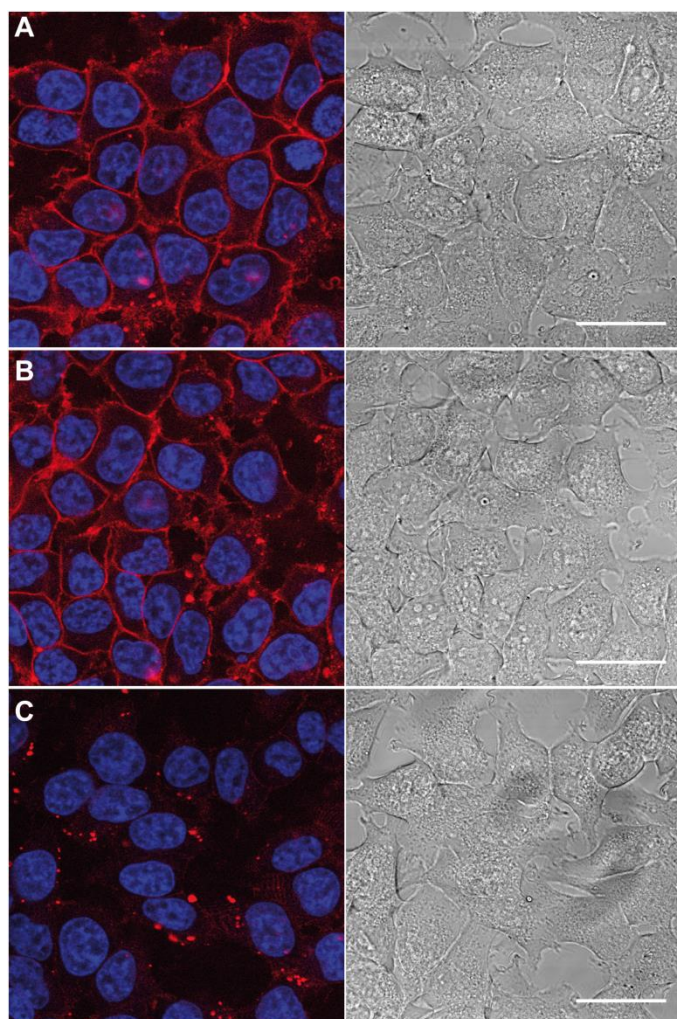

**Figure S1:** Labeling of metabolically engineered cell-surface glycoconjugates. HEK 293T cells were grown for 48 h with 50  $\mu\text{M}$   $\text{Ac}_4\text{GlcNCyoc}$  (**1**, A), 50  $\mu\text{M}$   $\text{Ac}_4\text{GalNCyoc}$  (**2**, B), or with PBS (solvent control, C) and subsequently incubated with Tz–biotin **10** (1 mM, 3 h, 37 °C) followed by incubation with streptavidin–AF647. Nuclei were stained with Hoechst33342. Scale bar: 30  $\mu\text{m}$ .

### Metabolic engineering with HeLa S3 cells

HeLa S3 cells ( $16,000 \text{ cells cm}^{-2}$ ) were seeded in 4-well ibiTreat  $\mu$ -Slides (ibidi). After 12 h cells were incubated for 48 h with 50  $\mu\text{M}$  cyclopropene-labeled sugar ( $\text{Ac}_4\text{GlcNCyoc}$  (**1**),  $\text{Ac}_4\text{GalNCyoc}$  (**2**) or  $\text{Ac}_4\text{ManNCyoc}$  (**3**)). The sugars were prepared as stock solutions in DMSO (100 mM) and diluted into media. DMSO only or 50  $\mu\text{M}$  1,3,4,6-tetra-*O*-acetyl-*N*-acetylglucosamine ( $\text{Ac}_4\text{GlcNAc}$ ) were added as controls. Cells were washed two times with PBS and then treated with Tz–biotin **10** (1 mM) for 1 h at 37 °C. After two washes with PBS, cells were incubated with streptavidin–AlexaFluor555 ( $6.6 \mu\text{g mL}^{-1}$ ) and Hoechst 33342 ( $10 \mu\text{g mL}^{-1}$ ) for 20 min at 37 °C in the dark. Cells were washed twice with PBS, and DMEM was added for microscopy. A Zeiss LSM 780 equipped with a 40 x 1.4 Plan Apo oil DIC immersion objective and a GaAsP-detector array for spectral imaging was employed. Analysis of the obtained data was performed using Image J software version 1.45 S.2. Results are shown in Figure S2.

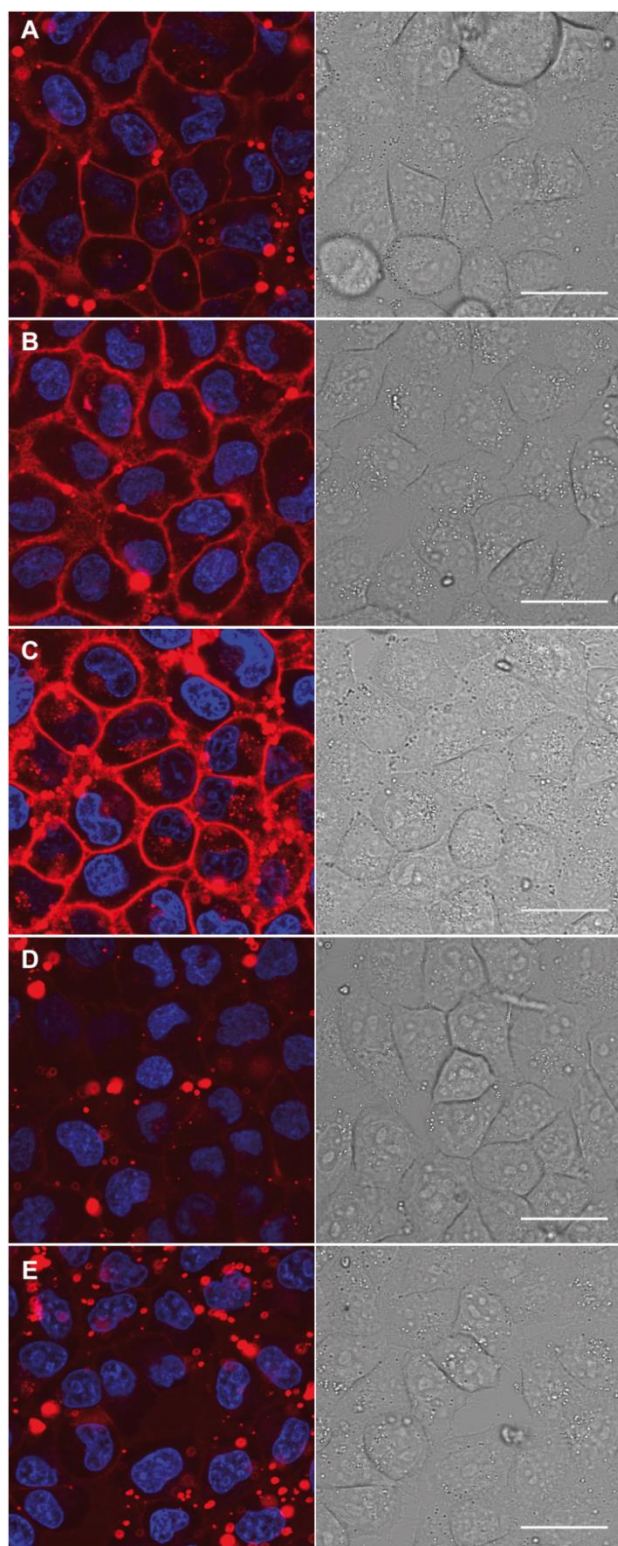

**Figure S2:** Labeling of metabolically engineered cell-surface glycoconjugates. HeLa S3 cells were grown for 48 h with 50  $\mu\text{M}$   $\text{Ac}_4\text{GlcNCyoc}$  (**1**, A), 50  $\mu\text{M}$   $\text{Ac}_4\text{GalNCyoc}$  (**2**, B), 50  $\mu\text{M}$   $\text{Ac}_4\text{ManNCyoc}$  (**3**, C), 50  $\mu\text{M}$   $\text{Ac}_4\text{GlcNAc}$  (D) or with DMSO (solvent control, E) and subsequently incubated with Tz-biotin **10** (1 mM, 1 h, 37 °C) followed by incubation with streptavidin-AF555. Nuclei were stained with Hoechst33342. Scale bar: 30  $\mu\text{m}$ .

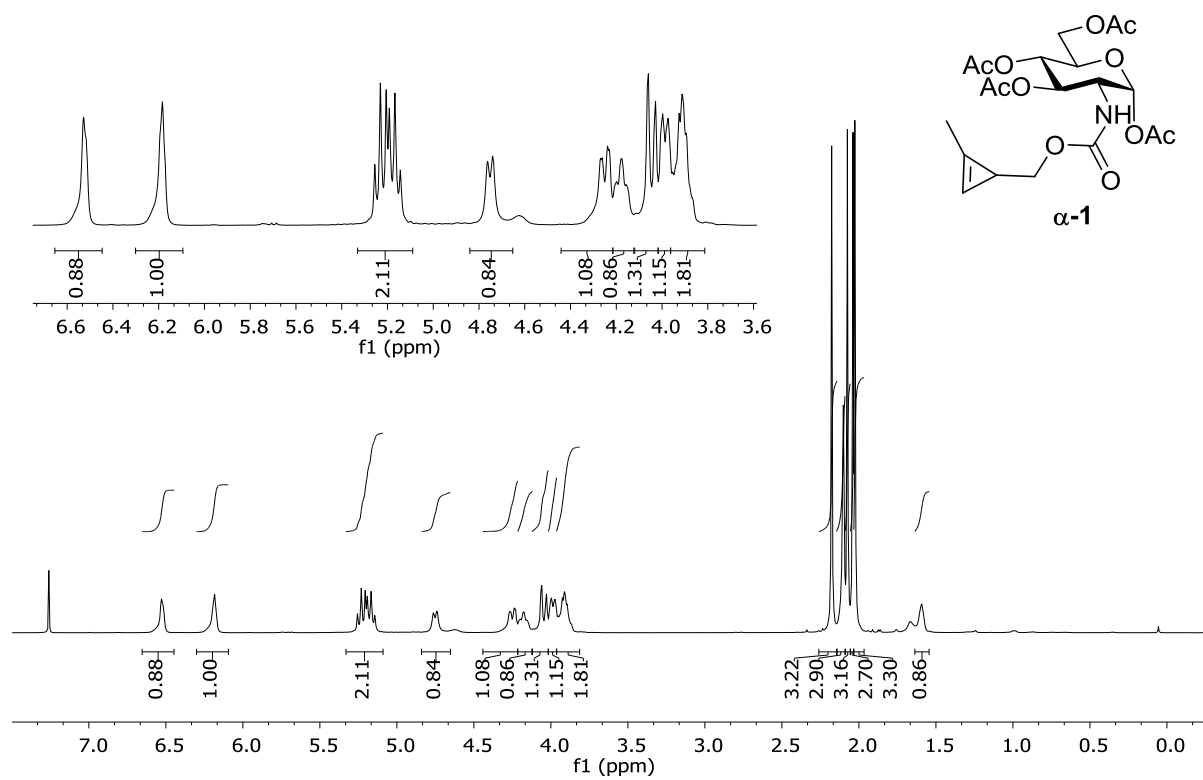

**$^1\text{H}$  NMR (400 MHz,  $\text{CDCl}_3$ )**

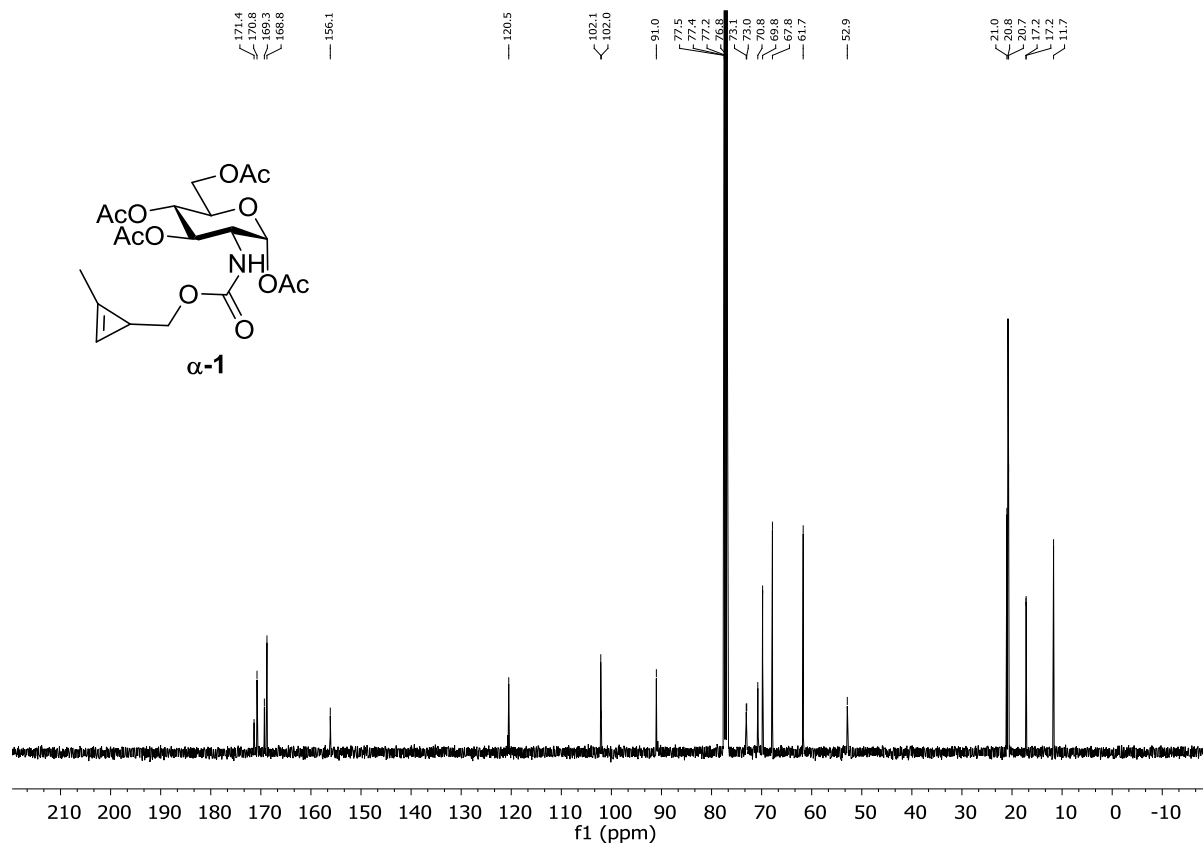

**$^{13}\text{C}$  NMR (101 MHz,  $\text{CDCl}_3$ )**

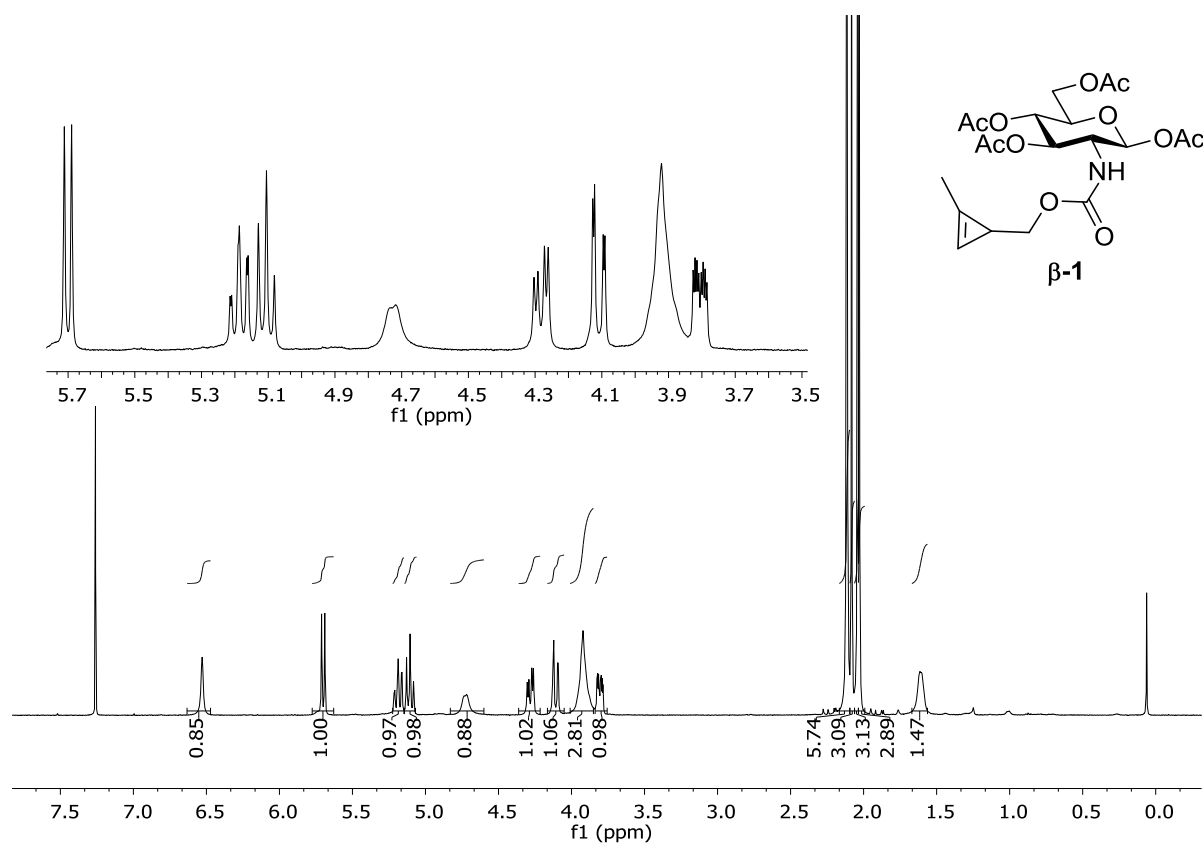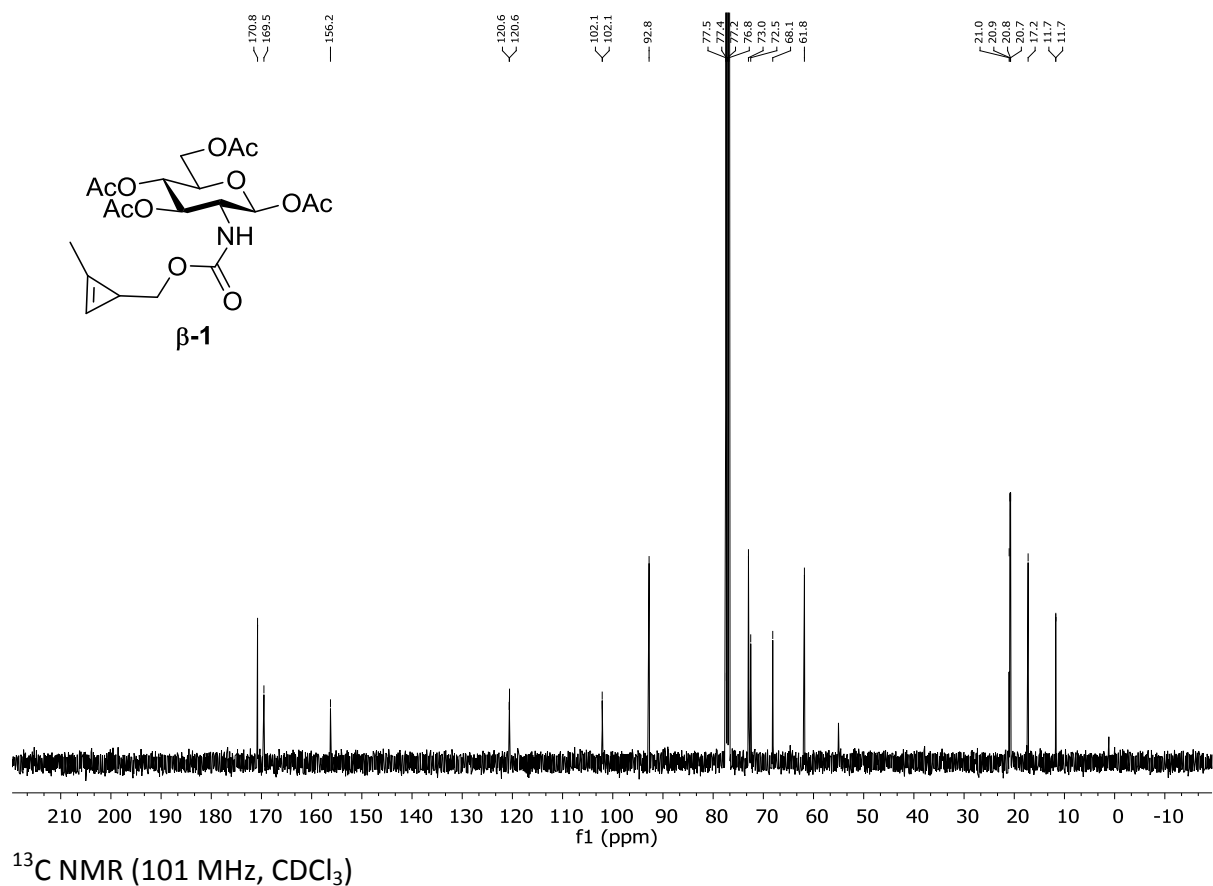

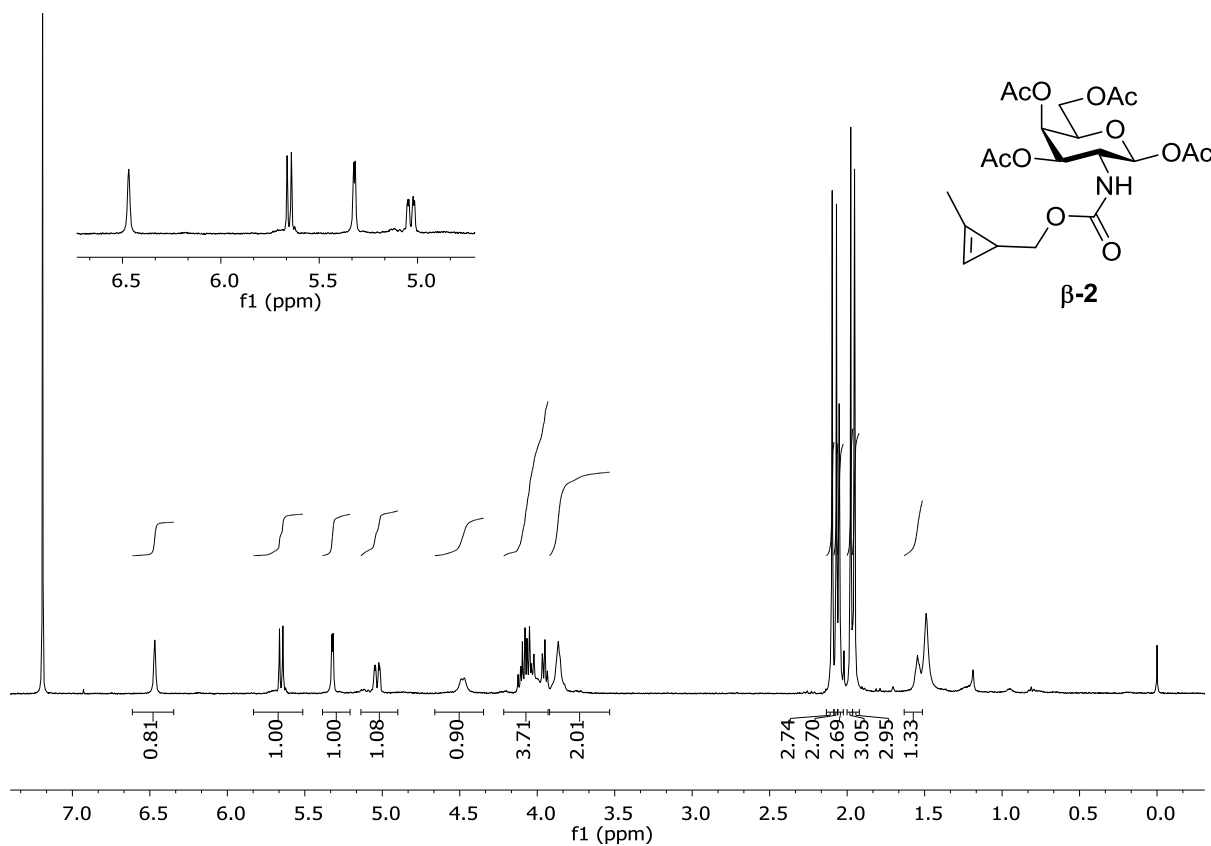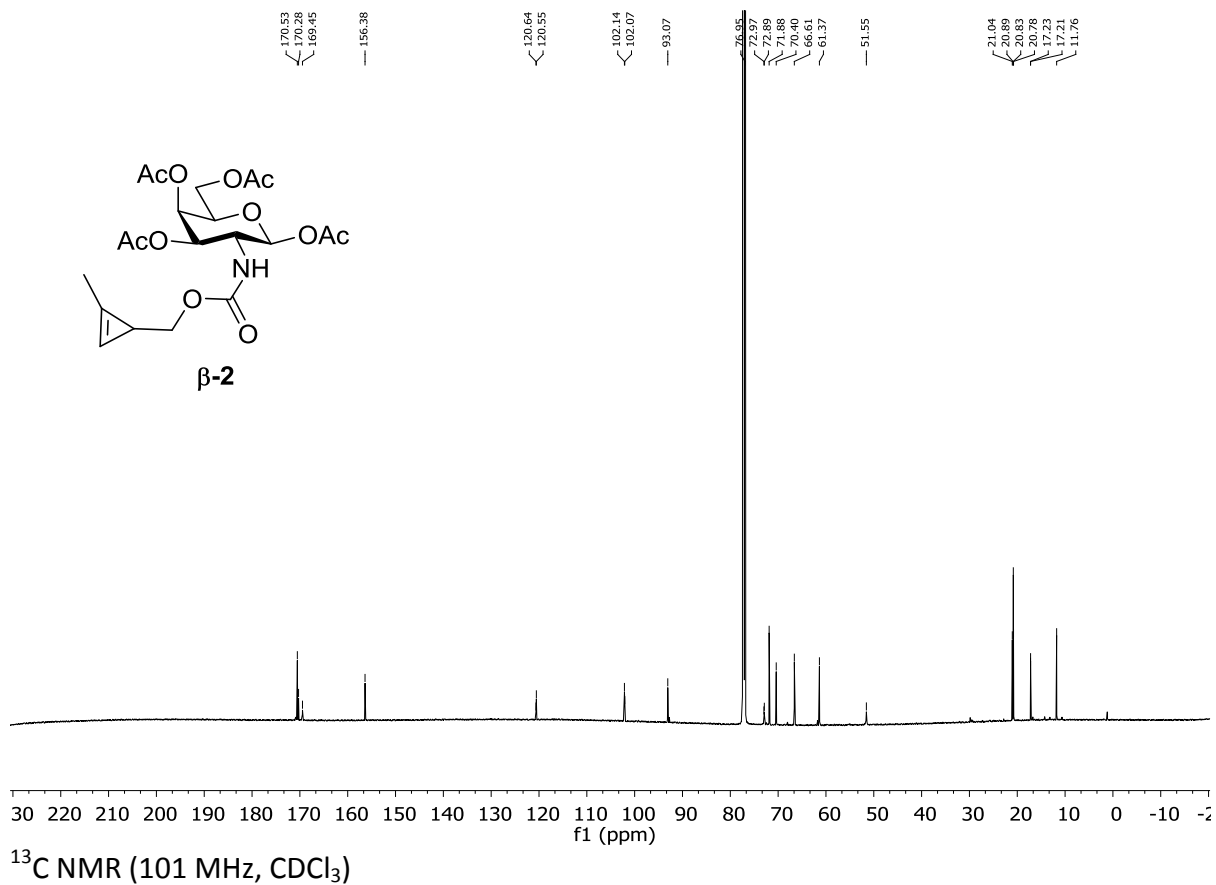

Supplement: Additional file 1 [file 1860-5397-10-232-S1.pdf]
